# Supplementary material for: Cofactor recycling for co-production of 1,3-propanediol and glutamate by metabolically engineered Corynebacterium glutamicum
Source: PubMed Central journal article supplement (PMC5296756; doi:10.1038/srep42246), 2017-02-08

**Cofactor recycling for co-production of 1,3-propanediol and glutamate by metabolically engineered *Corynebacterium glutamicum***

Jinhai Huang<sup>1</sup>, Yao Wu<sup>1</sup>, Wenjun Wu<sup>1</sup>, Ye Zhang<sup>1</sup>, Dehua Liu<sup>1,2</sup> and Zhen Chen<sup>1,2\*</sup>

1. Department of Chemical Engineering, Tsinghua University, Beijing 100084, China
2. Tsinghua Innovation Center in Dongguan, Dongguan 523808, China

\**Corresponding author:* Zhen Chen    E-mail: [zhenchen2013@mail.tsinghua.edu.cn](mailto:zhenchen2013@mail.tsinghua.edu.cn)

Tel: +86-10-62772130.    Fax: +86-10-62792128

**Supplementary Table 1 : Primers used for the construction of *C. glutamicum***

**mutants**

| Name | Sequence                                                    | Purpose                                             |
|------|-------------------------------------------------------------|-----------------------------------------------------|
| 11-F | CTATGACATGATTACGAATTAAGGAGATAT<br>ACCATGAACAACCTTTAATCTGCAC | To amplify gene of yqhD                             |
| 11-R | ATATCTCCTTTTAGCGGGCGGCTTCG                                  |                                                     |
| 12-F | CGCCCGCTAAAAGGAGATATACCATGAGAT<br>CGAAAAGATTTGAAG           | To amplify gene of pduCDEGH                         |
| 12-R | TGCCTGCAGGTCGACTCTAGTTAAGCATGG<br>CG                        |                                                     |
| 13-F | ACGAATTAAGGAGATATACCATGAGCTATC<br>GTATGTTTGATTATCTGGTG      | To amplify gene of dhaT                             |
| 13-R | ATCTCATGGTATATCTCCTTTCAGAATGCCT<br>GGCGGAAAA                |                                                     |
| 14-F | AAGGAGATATACCATGAGATCGAAAAGAT<br>TTGAA                      | To amplify the backbone of pEC-<br>yqhD-pdu         |
| 14-R | GGTATATCTCCTTAATTCGTAATCATGTCAT<br>AGCTGT                   |                                                     |
| 15-F | TATACGAAGCCGCCCGCTAAGAATTCCAAA<br>AGCTGGGTACCTCTATCTG       | To amplify the H36 promoter from<br>plasmid pEC-H36 |
| 15-R | TCAAATCTTTTCGATCTCATGGATCCCATGC<br>TACTCCTACC               |                                                     |
| 16-F | ATGAGATCGAAAAGATTTGAAGCACTG                                 | To amplify the backbone of pEC-<br>yqhD-pdu         |
| 16-R | TTAGCGGGCGGCTTCGTATAT                                       |                                                     |
| 17-F | TATATACGAAGCCGCCCGCTAAGATTTTCAG<br>GATGCCGATAATGAACCAG      | To amplify the gene of glpF                         |
| 17-R | TAGAGGTACCCAGCTTTTGGTTACTCATCG<br>ATACCGCATTTCGCAC          |                                                     |

**Supplementary Table 2. Operon structure in different expression vectors.**

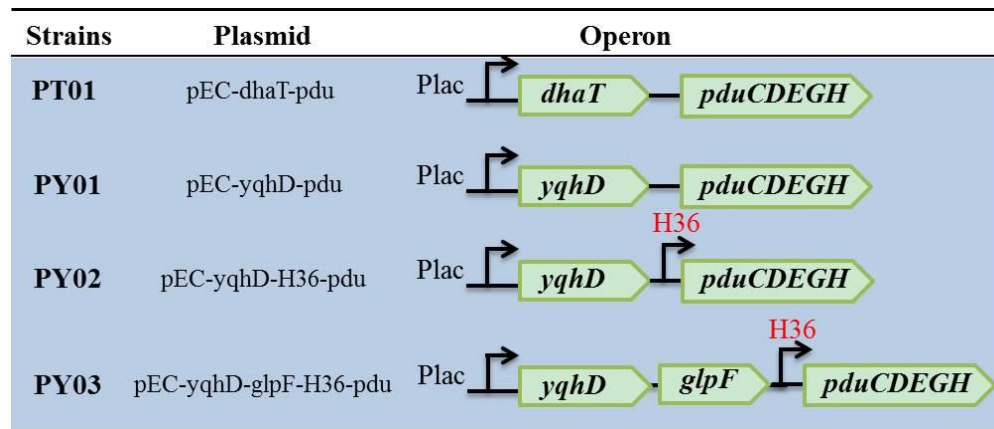

Supplement: srep42246-s1.pdf [file srep42246-s1.pdf]
